# Supplementary material for: Seeing and Hearing a Word: Combining Eye and Ear Is More Efficient than Combining the Parts of a Word
Source: PubMed Central journal article supplement (PMC3667182; doi:10.1371/journal.pone.0064803), 2013-05-29
Supplement: pone.0064803.s002.pdf [file pone.0064803.s002.pdf]

Normalized audio energy  $a$

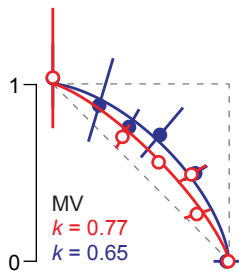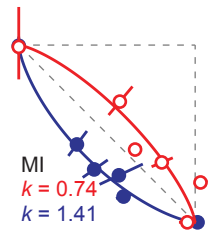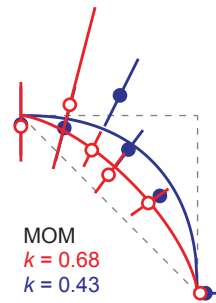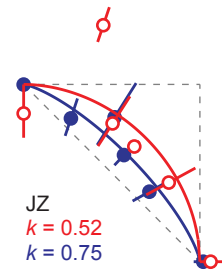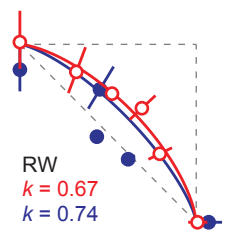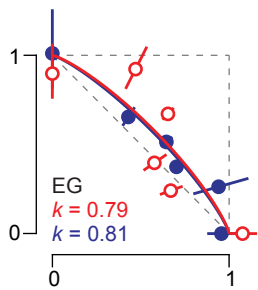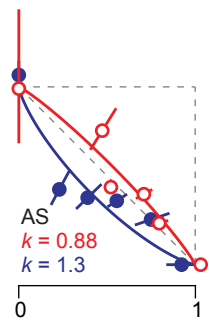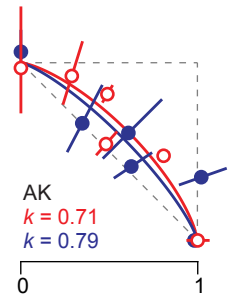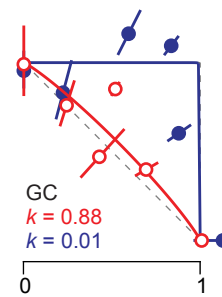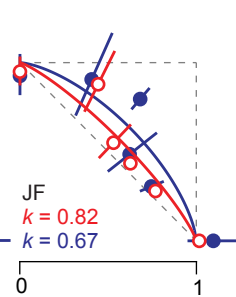

Normalized visual energy  $v$

Experiment —○— 1. single word —●— 2. sentence
